# Supplementary material for: Immune targeting of fibroblast activation protein triggers recognition of multipotent bone marrow stromal cells and cachexia
Source: PubMed Central journal article supplement — J Exp Med. 2013 Jun 3;210(6):1125–35. doi: 10.1084/jem.20130110 (PMC3674706; doi:10.1084/jem.20130110), 2013-06-03
Supplement: supp_jem.20130110_JEM_20130110_sm.pdf [file supp_jem.20130110_JEM_20130110_sm.pdf]

## SUPPLEMENTAL MATERIAL

Tran et al., <http://www.jem.org/cgi/content/full/jem.20130110/DC1>**Table S1.** Summary of IHC staining for FAP in various human tumors

| Sample ID | Cancer type               | Tumor characteristics            | % stroma | % of stromal cells that are FAP+ | FAP intensity |
|-----------|---------------------------|----------------------------------|----------|----------------------------------|---------------|
| 2230      | Melanoma                  | Metastatic                       | 30       | >50                              | 3+            |
| 3436-1    | Melanoma                  | Metastatic                       | 10       | >50                              | 2+            |
| 3581      | Melanoma                  | Metastatic                       | 50       | >50                              | 3+            |
| 3584      | Melanoma                  | Metastatic                       | 20       | >50                              | 1-2           |
| 3591-2    | Melanoma                  | Metastatic                       | 70       | >50                              | 3+            |
| *3593     | Melanoma                  | Metastatic                       | 20       | >50                              | 2-3+          |
| 3612      | Melanoma                  | Metastatic                       | 20       | >50                              | 3+            |
| 3614      | Melanoma                  | Metastatic                       | 30       | >50                              | 3+            |
| 3620      | Melanoma                  | Metastatic                       | 80       | >50                              | 3+            |
| 0090      | Colorectal adenocarcinoma | Moderately differentiated        | 40       | >50                              | 3+            |
| *0212     | Colorectal adenocarcinoma | Poorly differentiated metastatic | 60       | >50                              | 3+            |
| 0403      | Colorectal adenocarcinoma | Moderately differentiated        | 30       | >50                              | 3+            |
| 0663      | Mammary carcinoma         | Mucinous                         | 30       | >50                              | 2+            |
| 0879      | Mammary carcinoma         | Invasive ductal                  | 90       | <50                              | 3+            |
| *0951     | Mammary carcinoma         | Invasive ductal                  | 60       | >50                              | 3+            |
| 0264      | Pancreatic adenocarcinoma | Poorly differentiated            | 90       | >50                              | 2-3+          |
| *0586     | Pancreatic adenocarcinoma | Moderately differentiated        | 80       | >50                              | 3+            |
| 0986      | Pancreatic adenocarcinoma | Moderately differentiated        | 60       | >50                              | 3+            |

\*Shown in Fig. 1 (A-D).

**Table S2.** Genetic sequence of the codon-optimized FAP5-CAR construct

| CAR component                                                                          | Sequence (5'–3')                                                                                                                                                                                                                                                                                                                                                      |
|----------------------------------------------------------------------------------------|-----------------------------------------------------------------------------------------------------------------------------------------------------------------------------------------------------------------------------------------------------------------------------------------------------------------------------------------------------------------------|
| 5' flanking sequence (contains XhoI restriction site, Kozak sequence, and start codon) | CTCGAGCCGCCACCATGGTT                                                                                                                                                                                                                                                                                                                                                  |
| Human GM-CSFR leader sequence                                                          | TTGCTTGTGACCAGCCTCCTGCTCTGTGAACTGCCTCATCTGCACTTCTGTTGATCCCA                                                                                                                                                                                                                                                                                                           |
| FAP5 scFv heavy chain                                                                  | CAGGTGCAGTCCAGCAGAGTGCGCAGAGCTCGCTCGCCAGGCGCTTCTGTGAATCTGAGTTGTAAGG<br>CCTCCGGATATACTTTACGAACAACGGCATCACTGGCTGAAGCAGCGGACCGGCCAGGGCCTGGAGTG<br>GATCGGCGAAATATACCCCGGTCACAAACACTCTCTATAACGAGAAGTTAAGGGCAAAGCAACTCTGA<br>CCGCGGACAGGTCCTTAACACAGCCTATATGGAGCTGAGAAGCITGACGAGTGAGGACTCCGCTGTCTAT<br>TTTTGCGCCGAACTCTGACCGCTCTTTTGGTGGGGCCAGGGCAGCTCGTGACCGTAAGTGCG       |
| 218 linker                                                                             | GGCTCCTAGCGGTTCCGGCAAACCTGGCAGCGGAGAAGGCAGCACAAAGGG                                                                                                                                                                                                                                                                                                                   |
| FAP5 scFv light chain                                                                  | CAGATCGTCTGACGAGTCTCCAGCCATCATGAGCGCCTCACCCGGCGAAAAGGTGACCATGACCTGCTC<br>AGCCTCTTCTGGTGTGAATTCATGCACTGGTACCAGCAAAAAAGTGGGACCTCCCTAAAAGGTGGATCTT<br>CGATACCAGCAAACCTGGCTTCTGGCGTCCCGCAAGGTTAGCGGCTCTGGTCCGGCACATCATAAGCCT<br>GACGATCAGCAGCATGGAGGCAGAAGACGACGCTACTTACTGCCAGCAATGGAGCTTTAACCCACCTA<br>CTTTCGGAGGAGGAACAAAGCTGGAAATAAAAAGA                               |
| Joining sequence (contains NotI restriction site)                                      | GCGGCCGCA                                                                                                                                                                                                                                                                                                                                                             |
| Mouse CD8 hinge and transmembrane domain                                               | ACTACTACCAAGCCAGTGTGCGAACTCCCTCACCTGTGCACCCTACCGGGACATCTCAGCCCCAGAGACC<br>AGAAGATTGTCGGCCCCGTGGCTCAGTGAAGGGGACCGGATTGGACTTCGCCTGTGATATTTACATCTGGG<br>CACCCTTGGCCGAACTCTGCGTGGCCCTTCTGCTGTCCITGATCATCACTCTCATCTGCTACCACAGGAGCCGA                                                                                                                                       |
| Mouse CD28 signaling domain                                                            | AATAGTAGAAGGAACAGACTCCTCAAGTACTACCATGAACATGACTCCCGGAGGCCTG<br>GGCTCACTCGAAAGCCTTACCAGCCCTACGCCCTGCCAGAGACTTTGCAGCGTACCGCCCC                                                                                                                                                                                                                                           |
| Mouse 4-1BB signaling domain                                                           | AAATGGATCAGGAAAAATCCCCACATATTCAAGCAACCATTTAAGAAGACCACTGGAGCAGCTC<br>AAGAGGAAGATGCTGTAGCTGCCGATGTCCACAGGAAGAAGAAGGAGGAGGAGGCTATGAGCTG                                                                                                                                                                                                                                  |
| Mouse CD3-ζ signaling domain                                                           | AGAGCAAATTCAGCAGGAGTGACAGAGACTGCTGCCAACCTGCAGGACCCCAACCAGCTCTACAATGAGC<br>TCAATCTAGGGCGAAGAGAGGAATATGACGCTTGGAGAAGAAGCGGGCTCGCGATCCAGAGATGGGAG<br>GCAAACAGCAGAGGAGGAGGAACCCCAAGGAAGGCGTATACAATGCACTGCAGAAAAGACAAGATGGCA<br>GAAGCCTACAGTGAGATCGGCACAAAAGGCGAGAGGCGGAGAGGCAAGGGGCACGATGGCCTTTACCA<br>GGGTCTCAGCACTGCCACCAAGGACACCTATGATGCCCTGCATATGCAGACCCTGGCCCTCGCTAA |

The FAP5 scFv sequence was obtained from the United States Patent Application Publication: US 2009/0304718 A1. The variable heavy chain sequence comprises of amino acids 20 to 136 of SEQ ID NO: 1 from the patent application. The variable light chain sequence comprises of amino acids 23 to 129 of SEQ ID NO: 2 from the patent application.

**Table S3.** Genetic sequence of the codon-optimized Sibro-CAR construct

| CAR construct                                                                          | Sequence (5'–3')                                                                                                                                                                                                                                                                                                                                                                                     |
|----------------------------------------------------------------------------------------|------------------------------------------------------------------------------------------------------------------------------------------------------------------------------------------------------------------------------------------------------------------------------------------------------------------------------------------------------------------------------------------------------|
| 5' flanking sequence (contains XhoI restriction site, Kozak sequence, and start codon) | CTCGAGCCGCCACCATGGTT                                                                                                                                                                                                                                                                                                                                                                                 |
| Human GM-CSFR leader sequence                                                          | CTCTTGTAACCAAGTCTGTTGCTCTGCGAACTGCCCAACCCGGCCCTCCTCTTGATTCCG                                                                                                                                                                                                                                                                                                                                         |
| Sibrotuzumab scFv heavy chain                                                          | CAGGTACAGCTTGTGCAGTCCGGCGCTGAGGTCAAAAAACCAGGCGCCAGCGTTAAGGTGTCATGCAAG<br>ACTAGCAGGTATACATTCAGTGAATACACAATACACTGGGTGCGACAGGCTCCCGGGCAAAGACTGGAGT<br>GGATTGGGGGCATAAACCCCAACAATGGGATCCCGAATTATAATCAGAAATTAAGGGTCGGGTGACAAT<br>CACAGTAGACTAGCGCATCAACCGCTACATGGAGCTCAGTCCCTTAGGTCTGAAGACACAGCAGTT<br>TATTACTGCGCAAGGCGCCGCATCGCTACGGCTATGACGAAAGGTCATGCTATGGACTATTGGGGGCAAG<br>GGACACTCGTGAAGTGTCTCATCA |
| 218 linker                                                                             | GGAAGTACTAGTGGCTCAGGAAAGCCCGGATCCGGGGAAGGATCTACGAAGGGG                                                                                                                                                                                                                                                                                                                                               |
| Sibrotuzumab scFv light chain                                                          | GACATTGTCATGACGAGAGTCTGACAGTCTCGCCGTGCTCTTGGGAGAGCGGGCAACAATCAATTGTA<br>AAAGCAGCCAATCTCTCTGTACAGCCGGAACCAGAAAGAACTACCTCGCCTGGTACCAGCAGAAACCCG<br>GTCAGCCGCCAAGCTCCTGATTTTTGGGCCAGCACTCGGAAAGCGGTGCCCCGACAGATTTCCGG<br>ATCTGGCTTCGGGACAGATTTTACCCTGACGATCTCATCACTCAGGCAGAGGATGTGGCCGCTACTACTG<br>TCAACAGTATTTTCTACCCCTCACTTTCGGCCAAGGAACCAAGGTGGAGATTA                                                |
| Joining sequence (contains NotI restriction site)                                      | GCGGCCGCA                                                                                                                                                                                                                                                                                                                                                                                            |
| Human CD8 hinge and transmembrane domain                                               | TTCGTGCCGGTCTTCTGCCAGCGAAGCCACCACGACGCCAGCGCCGCGACCAACAACCCGGCGCCC<br>ACCATCGCGTCGACGCCCTGTCCCTGCGCCAGAGGCGTGCCGGCCAGCGGGGGGGCGCAGTGC<br>ACACGAGGGGGCTGGACTTCGCCTGTGATATCTACATCTGGGCGCCCTTGGCCGGGACTTGTGGGTCT<br>TCTCTGTCACTGGTTATCACCCCTTACTGCAACCACAGGAAC                                                                                                                                          |
| Human CD28 signaling domain                                                            | AGGAGTAAGAGGAGCAGGCTCTGCACAGTGACTACATGAACATGACTCCCCGCGCCCCG<br>GGCCACCCGCAAGCATTACCAGCCCTATGCCCCACCACGCGACTTCGACGCTATCGCTCC                                                                                                                                                                                                                                                                          |
| Human 4-1BB signaling domain                                                           | CGTTTCTGTGTTAAACGGGGCAGAAAGAACTCCTGTATATTTCAAACAACCATTTATGAGACCA<br>GTACAAACTACTCAAGAGGAAGATGGCTGTAGCTGCCGATTTCCAGAAGAAGAAGAGGAGGATGTGAAGT                                                                                                                                                                                                                                                           |
| Human CD3-ζ signaling domain                                                           | AGAGTGAAGTTCAGCAGGAGCGCAGACGCCCCCGCTACCAGCAGGGCCAGAACCAGCTCTATAACGA<br>GCTCAATCAGGACGAAGAGAGGAGTACGATGTTTTGGACAAGAGACGTGGCCGGGACCCTGAGATGG<br>GGGAAAGCCGAGAAGGAAGAACCTCAGGAAGGCCTGTACAATGAACTGCAGAAAGATAAGATGGC<br>GGAGGCTACAGTGAGATTGGGATGAAAGGCGAGCGCCGAGGGGCAAGGGGCACGATGGCCTTAC<br>CAGGGTCTCAGTACAGCCCAAGGACACCTACGACGCCCTTACATGCAAGGCCCTGCCCCCTCGCTAA                                           |

The Sibrotuzumab (BIB1) scFv sequence was obtained from the United States Patent Application Publication: US 2003/0103968 A1. The variable heavy and light chain sequences are derived from SEQ ID NO: 12, and SEQ ID NO: 2 of the patent application, respectively.
